# Supplementary material for: Population Pharmacokinetics of Isavuconazole in Critical Care Patients with COVID-19-Associated Pulmonary Aspergillosis and Monte Carlo Simulations of High Off-Label Doses
Source: MDPI journal article supplement (doi:10.3390/jof9020211), 2023-02-06
Supplement: s1 [file s1]

## Supplementary Materials

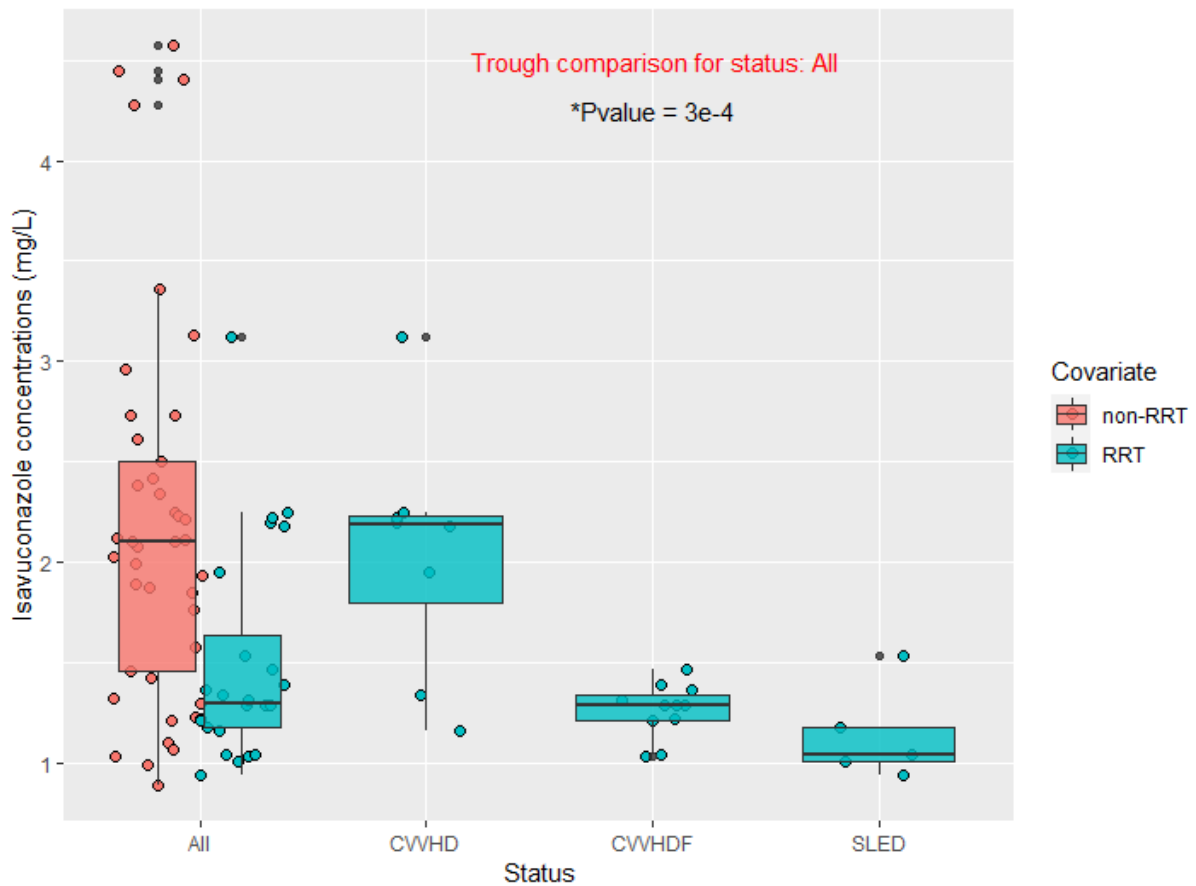

**Figure S1.** Variability comparison of trough concentrations between RRT and non-RRT.  
\*Welch two sample t-test

**Calculation S1.** Wald test p-value calculation for covariate tagged as a regressor.

- (1) To test if the shape of  $\beta_{CI}$  is significantly different from 0:

$$H_0 : \beta_{CI} = 0 \text{ versus } H_1 : \beta_{CI} \neq 0$$

- (2) The parameter estimate and the standard error (s.e) was used to calculate the Wald statistic (W):

$$W = \frac{\beta_{CI\_estimated} - \beta_{CI\_ref}}{s.e\_estimated} = \frac{0.45 - 0}{0.1} = 4.5$$

- (3) W has to be compared to a standard normal distribution:

$$\text{Rscript, } pvalue = 2 * \text{pnorm}(W, \text{mean} = 0, \text{sd} = 1, \text{lower.tail} = \text{FALSE}) = 6.8e-6$$

Adapted from: <https://monolix.lixoft.com/faq/complex-parameter-covariate-relationships-time-dependent-covariates/>

**Table S1.** RRT parameters of patients receiving intravenous isavuconazole.

| Patient | Number of days before treatment initiation | Number of days before sampling | CRRT/SLED machine       | CRRT/SLED mode | Filter type        | Blood flow rate (mL/min) | Effluent flow rate (L/h) |
|---------|--------------------------------------------|--------------------------------|-------------------------|----------------|--------------------|--------------------------|--------------------------|
| 1       | 3                                          | 8                              | Fresenius 5008          | SLED           | Nephral ST400      | 200                      | 0.2                      |
| 2       | -2                                         | 5                              | Fresenius Multifiltrate | CVVHD CiCa     | Ultraflux AV 1000S | 100                      | 2                        |
| 3       | 1                                          | 6                              | Fresenius Multifiltrate | CVVHD CiCa     | Ultraflux AV 1000S | 100                      | 2                        |
| 4       | -5                                         | -1                             | Fresenius 5008          | SLED           | Nephral ST400      | 200                      | 0.2                      |
| 5       | 9                                          | 19                             | Prismaflex              | CVVHDF         | AN69               | 200                      | 3                        |
| 6       | -3                                         | 7                              | Fresenius multifiltrate | CVVHD CiCa     | Ultraflux AV 1000S | 150                      | 3                        |
